# Supplementary material
Source: HighWire-hosted journal article supplement (https://jnm.snmjournals.org/highwire/filestream/95569/field_highwire_adjunct_files/0/232488_Supplemental_Data.pdf)
Supplement: 232488_Supplemental_Data.pdf [file 232488_Supplemental_Data.pdf]

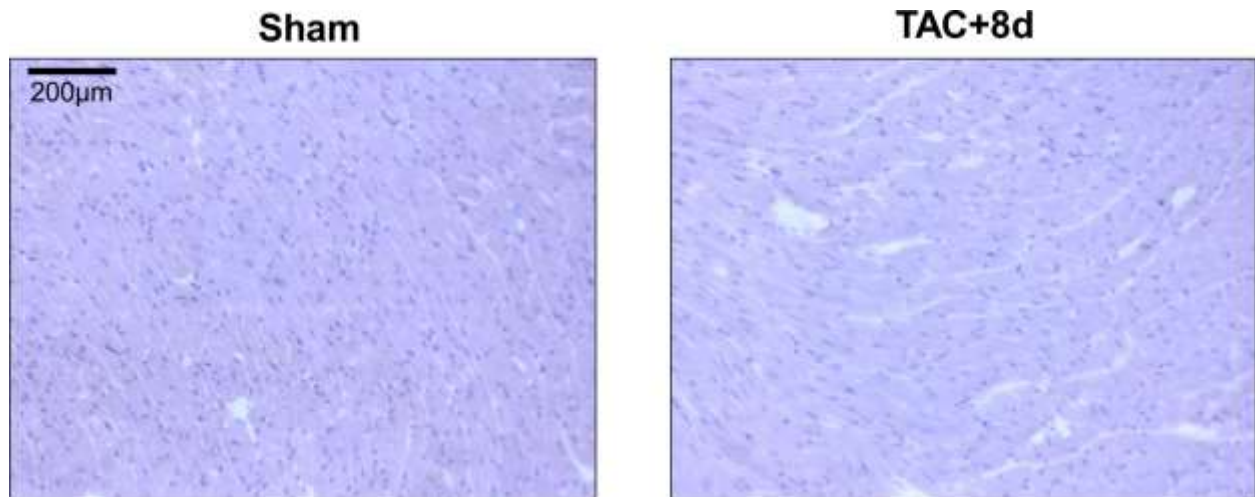

**Supplemental Figure 1.** Immunohistologic Ly6G+ staining of representative long axis sections demonstrates no change in Ly6G-positive cells in left ventricular myocardium 8d after TAC compared to sham.

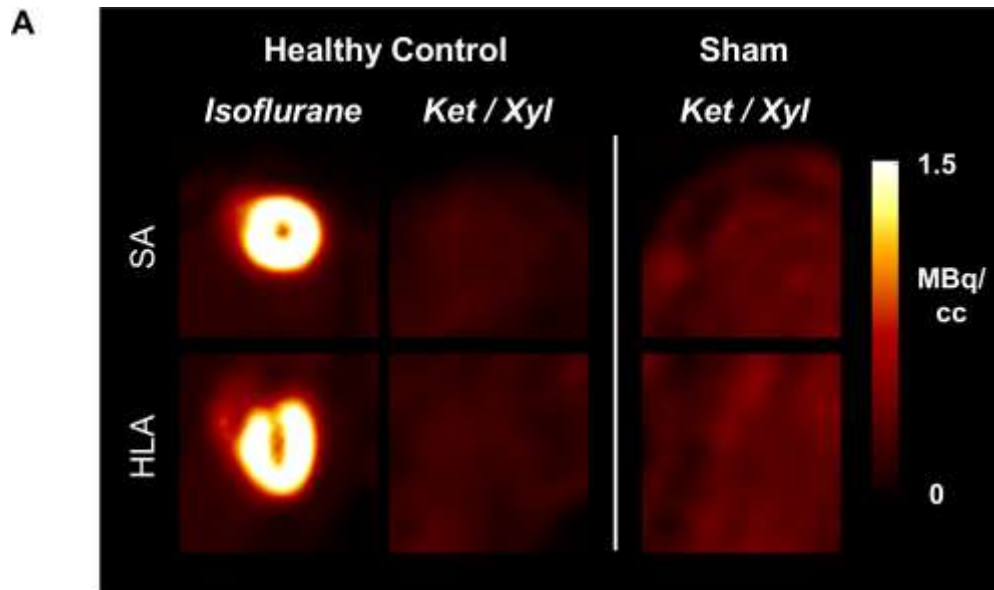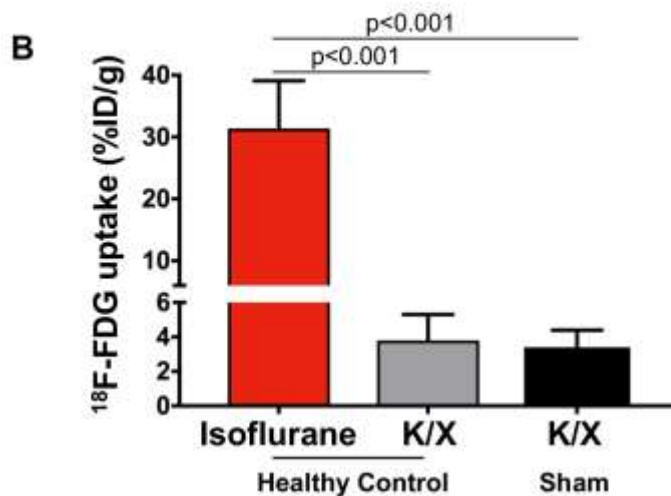

**Supplemental Figure 2.** Ketamine-xylazine (K/X) anesthesia suppresses cardiomyocyte glucose uptake effectively in healthy control and sham mice

(A) Robust  $^{18}\text{F}$ -FDG uptake in healthy myocardium under isoflurane anesthesia without K/X suppression. K/X suppression of cardiomyocyte  $^{18}\text{F}$ -FDG uptake lowered tracer uptake in healthy control mice to background levels, comparable to sham-operated animals. (B) Quantitative  $^{18}\text{F}$ -FDG signal shows elevation in healthy mice under isoflurane anesthesia ( $31.4 \pm 7.7$  %ID/g,  $n=6$ ). Signal under K/X anesthesia is comparable in healthy control mice ( $3.8 \pm 1.5$  %ID/g,  $n=5$ ) and sham ( $3.4 \pm 1.0$  %ID/g,  $n=8$ ).

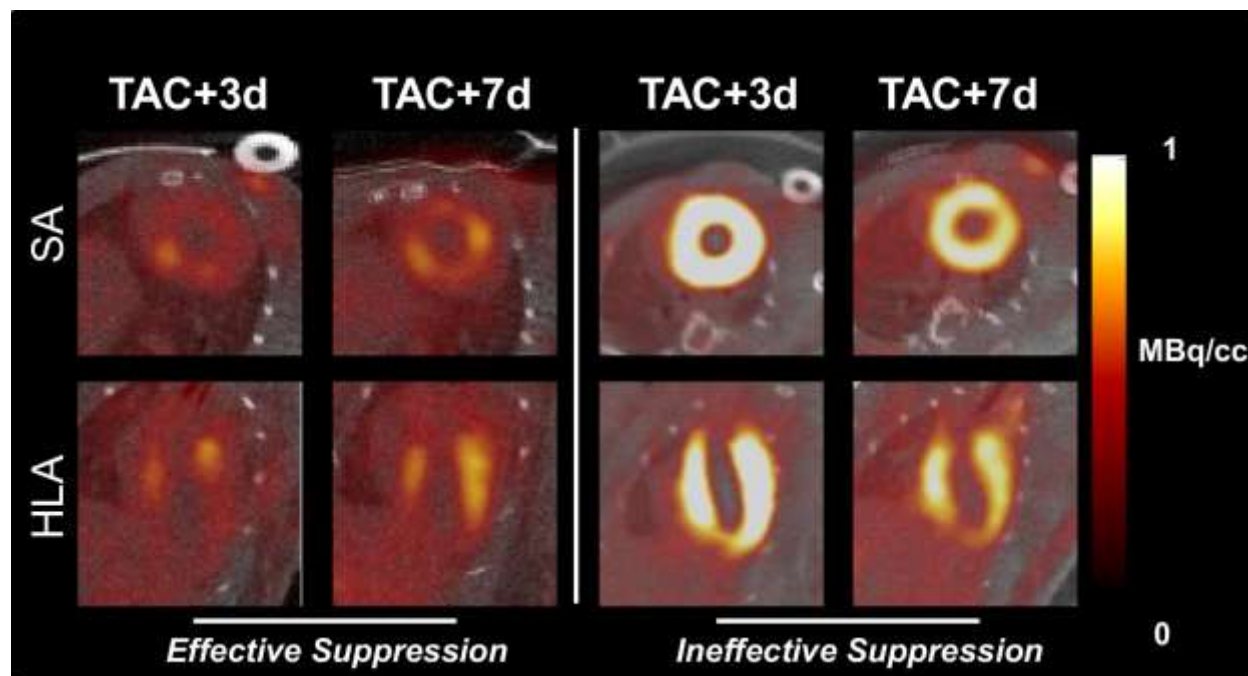

**Supplemental Figure 3.** Cardiac functional parameters are not related to elevated  $^{18}\text{F}$ -FDG signal at 8d after surgery (A) Correlation of stroke volume ( $\mu\text{L}$ ) at d2 and d8 to  $^{18}\text{F}$ -FDG signal. (B) Elevated left ventricular end systolic volumes ( $\mu\text{L}$ ), end diastolic volumes ( $\mu\text{L}$ ), left ventricular mass and ejection fraction (%) at 8d do not correlate to  $^{18}\text{F}$ -FDG signal at 7d.

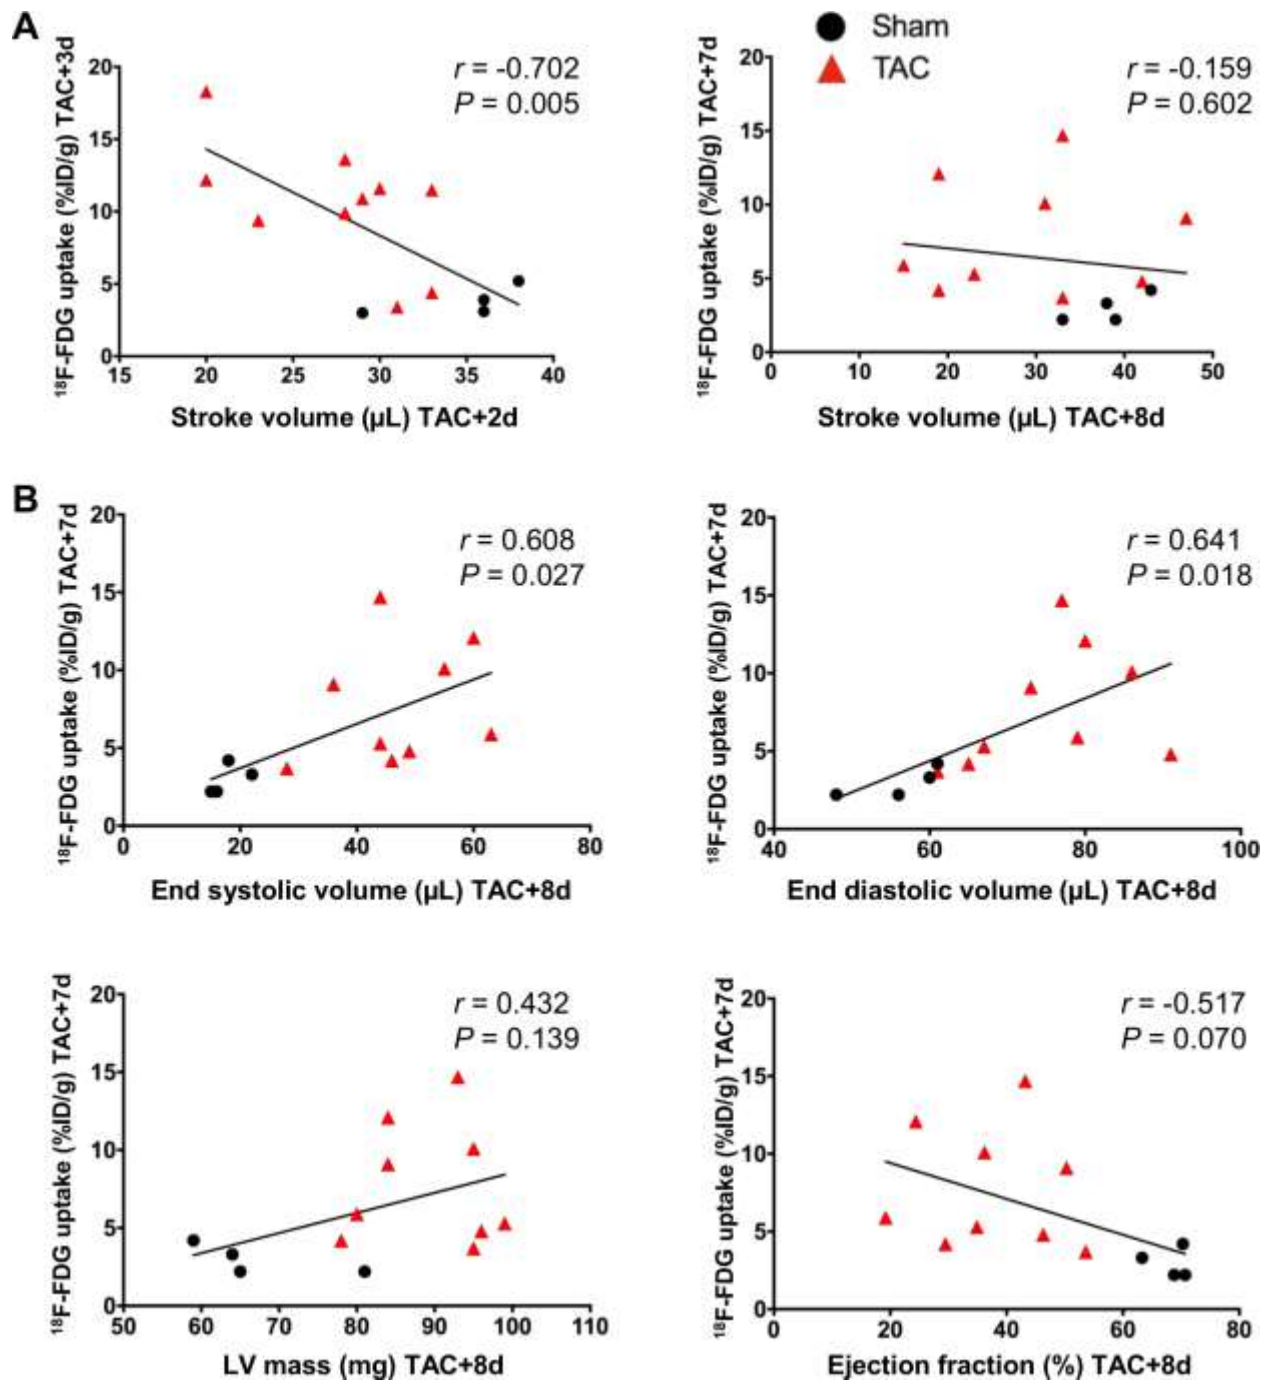

**Supplemental Figure 4.** Ineffective K/X suppression of cardiomyocyte glucose uptake visualizes altered cardiac glucose metabolism in response to cardiac pressure overload

Diffuse  $^{18}\text{F}$ -FDG signal in SA and HLA images under effective K/X suppression of cardiomyocyte glucose uptake reflects global myocardial inflammation, whereas robust  $^{18}\text{F}$ -FDG signal in the LV shows insufficient suppression of cardiomyocyte glucose uptake.
